# Supplementary material
Source: PubMed Central journal article supplement (PMC4616952)

| Phylum         | Family                        | Genus/Species                       | Vat  | Tank Curd | Curd Bench | Knife Curd | Dipper | Hand | Chopper | Stretcher | Molder | Chopper 2 | Stretcher 2 | Molder 2 | Tank Scamorza | Scamorza | Tank Ricotta | Mold Ricotta | Ricotta | Mold Mozzarella | Mozzarella | Mold Grancacio | Grancacio | Brine Caciocavallo | Cacio AfterMoulding | Rope | Hook t0 | Hook t30 | Caciocavallo t0 | Caciocavallo t30 |
|----------------|-------------------------------|-------------------------------------|------|-----------|------------|------------|--------|------|---------|-----------|--------|-----------|-------------|----------|---------------|----------|--------------|--------------|---------|-----------------|------------|----------------|-----------|--------------------|---------------------|------|---------|----------|-----------------|------------------|
| Proteobacteria | <i>Oxalobacteraceae</i>       | <i>Massilia</i>                     | 0.01 | 0.00      | 0.00       | 0.00       | 0.01   | 0.00 | 0.00    | 0.00      | 0.01   | 0.00      | 0.00        | 0.00     | 0.05          | 0.00     | 0.00         | 0.00         | 0.00    | 0.00            | 0.00       | 0.00           | 0.00      | 0.00               | 0.00                | 0.00 | 0.00    | 0.00     | 0.00            | 0.00             |
|                | <i>Bacteriovoraceae</i>       | –                                   | 0.00 | 0.01      | 0.00       | 0.00       | 0.00   | 0.00 | 0.00    | 0.00      | 0.00   | 0.00      | 0.00        | 0.00     | 0.00          | 0.00     | 0.00         | 0.00         | 0.00    | 0.00            | 0.00       | 0.00           | 0.00      | 0.00               | 0.00                | 0.00 | 0.00    | 0.00     | 0.00            | 0.00             |
|                | <i>Campylobacteraceae</i>     | <i>Arcobacter</i>                   | 0.00 | 0.00      | 0.00       | 0.00       | 0.00   | 0.00 | 0.00    | 0.00      | 0.00   | 0.00      | 0.00        | 0.00     | 0.00          | 0.02     | 0.00         | 0.00         | 0.00    | 0.00            | 0.00       | 0.00           | 0.00      | 0.00               | 0.00                | 0.00 | 0.00    | 0.00     | 0.00            | 0.00             |
|                | <i>Gammaproteobacteria</i>    | –                                   | 0.00 | 0.02      | 0.00       | 0.00       | 0.01   | 0.01 | 0.01    | 0.01      | 0.00   | 0.01      | 0.00        | 0.01     | 0.01          | 0.00     | 0.00         | 0.01         | 0.01    | 0.01            | 0.00       | 0.00           | 0.00      | 0.00               | 0.00                | 0.01 | 0.00    | 0.00     | 0.00            | 0.00             |
|                | <i>Aeromonadaceae</i>         | <i>Aeromonas</i>                    | 0.01 | 0.05      | 0.00       | 0.00       | 0.00   | 0.00 | 0.00    | 0.00      | 0.01   | 0.05      | 0.00        | 0.01     | 0.07          | 0.01     | 0.00         | 0.00         | 0.03    | 0.00            | 0.00       | 0.00           | 0.00      | 0.00               | 0.01                | 0.00 | 0.01    | 0.00     | 0.00            | 0.00             |
|                | <i>Alteromonadaceae</i>       | <i>Alishewanella</i>                | 0.00 | 0.00      | 0.00       | 0.00       | 0.00   | 0.00 | 0.00    | 0.00      | 0.02   | 0.00      | 0.00        | 0.00     | 0.00          | 0.00     | 0.00         | 0.00         | 0.00    | 0.00            | 0.00       | 0.00           | 0.00      | 0.00               | 0.00                | 0.00 | 0.00    | 0.00     | 0.00            | 0.00             |
|                | <i>Chromatiaceae</i>          | <i>Rheinheimera</i>                 | 0.00 | 0.00      | 0.00       | 0.00       | 0.00   | 0.00 | 0.00    | 0.00      | 0.00   | 0.00      | 0.00        | 0.00     | 0.00          | 0.00     | 0.00         | 0.00         | 0.00    | 0.00            | 0.00       | 0.00           | 0.00      | 0.00               | 0.00                | 0.00 | 0.00    | 0.00     | 0.00            | 0.00             |
|                | <i>Enterobacteriaceae</i>     | –                                   | 0.01 | 0.01      | 0.00       | 0.01       | 0.01   | 0.02 | 0.00    | 0.01      | 0.01   | 0.00      | 0.00        | 0.01     | 0.01          | 0.00     | 0.00         | 0.00         | 0.00    | 0.01            | 0.00       | 0.00           | 0.00      | 0.00               | 0.00                | 0.01 | 0.01    | 0.12     | 0.00            | 0.00             |
|                |                               | <i>Escherichia</i>                  | 0.00 | 0.00      | 0.00       | 0.04       | 0.00   | 0.00 | 0.00    | 0.07      | 0.00   | 0.01      | 0.00        | 0.00     | 0.00          | 0.00     | 0.00         | 0.00         | 0.00    | 0.00            | 0.00       | 0.00           | 0.01      | 0.00               | 0.00                | 0.00 | 0.00    | 0.00     | 0.00            | 0.00             |
|                |                               | <i>Raoultella</i>                   | 0.00 | 0.00      | 0.00       | 0.01       | 0.00   | 0.00 | 0.00    | 0.01      | 0.00   | 0.01      | 0.00        | 0.00     | 0.00          | 0.00     | 0.00         | 0.00         | 0.00    | 0.00            | 0.00       | 0.00           | 0.00      | 0.00               | 0.00                | 0.00 | 0.00    | 0.00     | 0.00            | 0.00             |
|                |                               | <i>Serratia</i>                     | 0.00 | 0.00      | 0.00       | 0.00       | 0.00   | 0.00 | 0.00    | 0.00      | 0.00   | 0.00      | 0.00        | 0.00     | 0.00          | 0.00     | 0.00         | 0.00         | 0.00    | 0.00            | 0.00       | 0.00           | 0.00      | 0.00               | 0.00                | 0.00 | 0.00    | 0.00     | 0.00            | 0.00             |
|                | <i>Halomonadaceae</i>         | –                                   | 0.00 | 0.00      | 0.00       | 0.00       | 0.00   | 0.00 | 0.00    | 0.00      | 0.00   | 0.00      | 0.00        | 0.00     | 0.00          | 0.00     | 0.00         | 0.00         | 0.00    | 0.00            | 0.00       | 0.00           | 0.00      | 0.00               | 0.00                | 0.00 | 0.00    | 0.00     | 0.00            | 0.00             |
|                |                               | <i>Chromohalobacter</i>             | 0.00 | 0.00      | 0.00       | 0.00       | 0.00   | 0.00 | 0.00    | 0.00      | 0.00   | 0.00      | 0.00        | 0.00     | 0.00          | 0.00     | 0.00         | 0.00         | 0.00    | 0.00            | 0.00       | 0.00           | 0.00      | 0.00               | 0.01                | 0.00 | 0.00    | 0.01     | 0.01            | 0.00             |
|                |                               | <i>Chromohalobacter canadensis</i>  | 0.00 | 0.00      | 0.00       | 0.00       | 0.00   | 0.00 | 0.00    | 0.00      | 0.00   | 0.00      | 0.00        | 0.00     | 0.00          | 0.00     | 0.00         | 0.00         | 0.00    | 0.00            | 0.00       | 0.00           | 0.00      | 0.02               | 0.50                | 0.00 | 0.14    | 0.07     | 0.21            | 0.00             |
|                |                               | <i>Halomonas</i>                    | 0.00 | 0.00      | 0.00       | 0.00       | 0.00   | 0.00 | 0.00    | 0.00      | 0.00   | 0.00      | 0.00        | 0.00     | 0.00          | 0.00     | 0.00         | 0.00         | 0.00    | 0.00            | 0.00       | 0.00           | 0.00      | 0.00               | 0.01                | 0.00 | 0.00    | 0.00     | 0.00            | 0.00             |
|                | <i>Legionellaceae</i>         | <i>Legionella</i>                   | 0.00 | 0.00      | 0.00       | 0.00       | 0.00   | 0.00 | 0.00    | 0.00      | 0.00   | 0.00      | 0.00        | 0.00     | 0.00          | 0.00     | 0.00         | 0.00         | 0.00    | 0.00            | 0.00       | 0.00           | 0.00      | 0.00               | 0.00                | 0.00 | 0.00    | 0.00     | 0.00            | 0.00             |
|                | <i>Moraxellaceae</i>          | –                                   | 0.01 | 0.02      | 0.01       | 0.04       | 0.01   | 0.01 | 0.00    | 0.00      | 0.00   | 0.06      | 0.00        | 0.00     | 0.00          | 0.00     | 0.05         | 0.01         | 0.00    | 0.00            | 0.00       | 0.00           | 0.01      | 0.00               | 0.00                | 0.00 | 0.00    | 0.00     | 0.00            | 0.00             |
|                |                               | <i>Acinetobacter</i>                | 0.33 | 0.11      | 0.02       | 0.01       | 0.08   | 0.05 | 0.02    | 0.04      | 0.02   | 0.23      | 0.18        | 0.02     | 0.01          | 0.01     | 0.01         | 0.06         | 0.02    | 0.18            | 0.00       | 0.03           | 0.00      | 0.01               | 0.01                | 0.02 | 0.00    | 0.00     | 0.00            | 0.00             |
|                |                               | <i>Acinetobacter johnsonii</i>      | 0.04 | 0.04      | 0.03       | 0.01       | 0.17   | 0.05 | 0.07    | 0.01      | 0.06   | 0.03      | 0.00        | 0.02     | 0.01          | 0.01     | 0.00         | 0.05         | 0.04    | 0.00            | 0.00       | 0.04           | 0.00      | 0.01               | 0.00                | 0.02 | 0.01    | 0.00     | 0.00            | 0.00             |
|                |                               | <i>Acinetobacter schindleri</i>     | 0.00 | 0.00      | 0.00       | 0.00       | 0.00   | 0.00 | 0.00    | 0.00      | 0.00   | 0.00      | 0.00        | 0.00     | 0.00          | 0.00     | 0.00         | 0.00         | 0.00    | 0.00            | 0.00       | 0.00           | 0.00      | 0.00               | 0.00                | 0.00 | 0.00    | 0.00     | 0.00            | 0.00             |
|                |                               | <i>Acinetobacter</i>                | 0.08 | 0.01      | 0.00       | 0.12       | 0.01   | 0.09 | 0.00    | 0.00      | 0.00   | 0.00      | 0.00        | 0.00     | 0.00          | 0.06     | 0.00         | 0.12         | 0.00    | 0.01            | 0.00       | 0.00           | 0.00      | 0.00               | 0.00                | 0.20 | 0.28    | 0.01     | 0.00            | 0.00             |
|                |                               | <i>Psychrobacter cryohalolentis</i> | 0.00 | 0.00      | 0.00       | 0.00       | 0.00   | 0.01 | 0.00    | 0.00      | 0.00   | 0.00      | 0.00        | 0.00     | 0.00          | 0.00     | 0.00         | 0.00         | 0.00    | 0.00            | 0.00       | 0.00           | 0.00      | 0.00               | 0.00                | 0.00 | 0.01    | 0.00     | 0.00            | 0.00             |
|                |                               | <i>Psychrobacter marincola</i>      | 0.00 | 0.00      | 0.00       | 0.00       | 0.00   | 0.00 | 0.00    | 0.00      | 0.00   | 0.00      | 0.00        | 0.00     | 0.00          | 0.00     | 0.00         | 0.00         | 0.00    | 0.00            | 0.00       | 0.00           | 0.00      | 0.00               | 0.00                | 0.00 | 0.00    | 0.00     | 0.00            | 0.00             |
|                | <i>Oceanospirillaceae</i>     | <i>Marinomonas</i>                  | 0.00 | 0.00      | 0.00       | 0.00       | 0.00   | 0.00 | 0.00    | 0.00      | 0.00   | 0.00      | 0.00        | 0.00     | 0.00          | 0.00     | 0.00         | 0.00         | 0.00    | 0.00            | 0.00       | 0.00           | 0.00      | 0.00               | 0.00                | 0.00 | 0.00    | 0.00     | 0.00            | 0.00             |
|                | <i>Pasteurellaceae</i>        | <i>Haemophilus parainfluenzae</i>   | 0.00 | 0.00      | 0.00       | 0.00       | 0.00   | 0.00 | 0.00    | 0.00      | 0.00   | 0.00      | 0.00        | 0.00     | 0.00          | 0.00     | 0.00         | 0.00         | 0.00    | 0.00            | 0.00       | 0.00           | 0.00      | 0.00               | 0.00                | 0.00 | 0.00    | 0.00     | 0.00            | 0.00             |
|                | <i>Pseudoalteromonadaceae</i> | <i>Pseudoalteromonas</i>            | 0.00 | 0.00      | 0.00       | 0.00       | 0.00   | 0.00 | 0.00    | 0.00      | 0.00   | 0.00      | 0.00        | 0.00     | 0.00          | 0.00     | 0.00         | 0.00         | 0.00    | 0.00            | 0.00       | 0.00           | 0.00      | 0.00               | 0.00                | 0.00 | 0.00    | 0.00     | 0.00            | 0.00             |
|                |                               | <i>Pseudomonas</i>                  | 0.06 | 0.19      | 0.40       | 0.20       | 0.23   | 0.23 | 0.49    | 0.26      | 0.48   | 0.08      | 0.38        | 0.23     | 0.50          | 0.05     | 0.32         | 0.32         | 0.30    | 0.21            | 0.05       | 0.34           | 0.04      | 0.08               | 0.01                | 0.21 | 0.02    | 0.01     | 0.00            | 0.00             |

| Phylum                  | Family                      | Genus/Species                   | Vat            | Tank Curd | Curd Bench | Knife Curd | Dipper | Hand | Chopper | Stretcher | Molder | Chopper 2 | Stretcher 2 | Molder 2 | Tank Scamorza | Scamorza | Tank Ricotta | Mold Ricotta | Ricotta | Mold Mozzarella | Mozzarella | Mold Grancacio | Grancacio | Brine Caciocavallo | Cacio AfterMoulding | Rope | Hook t0 | Hook t30 | Caciocavallo t0 | Caciocavallo t30 |
|-------------------------|-----------------------------|---------------------------------|----------------|-----------|------------|------------|--------|------|---------|-----------|--------|-----------|-------------|----------|---------------|----------|--------------|--------------|---------|-----------------|------------|----------------|-----------|--------------------|---------------------|------|---------|----------|-----------------|------------------|
| Proteobacteria          | <i>Pseudomonas</i>          | <i>Pseudomonas fragi</i>        | 0.00           | 0.01      | 0.00       | 0.00       | 0.01   | 0.00 | 0.01    | 0.01      | 0.01   | 0.01      | 0.00        | 0.01     | 0.00          | 0.00     | 0.00         | 0.00         | 0.02    | 0.00            | 0.00       | 0.00           | 0.00      | 0.00               | 0.01                | 0.00 | 0.00    | 0.00     | 0.00            |                  |
|                         |                             | <i>Pseudomonas veronii</i>      | 0.00           | 0.00      | 0.00       | 0.00       | 0.00   | 0.00 | 0.00    | 0.00      | 0.00   | 0.00      | 0.00        | 0.00     | 0.00          | 0.00     | 0.00         | 0.00         | 0.00    | 0.00            | 0.00       | 0.00           | 0.00      | 0.00               | 0.00                | 0.00 | 0.00    | 0.00     | 0.00            | 0.00             |
|                         | <i>Shewanellaceae</i>       | <i>Shewanella</i>               | 0.00           | 0.12      | 0.00       | 0.00       | 0.22   | 0.14 | 0.00    | 0.00      | 0.03   | 0.00      | 0.00        | 0.05     | 0.00          | 0.01     | 0.01         | 0.00         | 0.08    | 0.00            | 0.01       | 0.00           | 0.01      | 0.02               | 0.00                | 0.04 | 0.00    | 0.00     | 0.00            | 0.00             |
|                         | <i>Vibrionaceae</i>         | <i>Vibrio</i>                   | 0.00           | 0.00      | 0.00       | 0.00       | 0.00   | 0.00 | 0.00    | 0.00      | 0.02   | 0.00      | 0.00        | 0.00     | 0.00          | 0.00     | 0.00         | 0.00         | 0.00    | 0.00            | 0.00       | 0.00           | 0.00      | 0.00               | 0.00                | 0.00 | 0.00    | 0.00     | 0.00            | 0.00             |
|                         |                             | <i>Vibriorum oiensis</i>        | 0.00           | 0.00      | 0.00       | 0.00       | 0.00   | 0.00 | 0.00    | 0.00      | 0.00   | 0.00      | 0.00        | 0.00     | 0.00          | 0.00     | 0.00         | 0.00         | 0.01    | 0.00            | 0.00       | 0.00           | 0.00      | 0.00               | 0.00                | 0.00 | 0.00    | 0.00     | 0.00            | 0.00             |
|                         | <i>Xanthomonadaceae</i>     | –                               | –              | 0.00      | 0.00       | 0.00       | 0.00   | 0.00 | 0.00    | 0.00      | 0.00   | 0.00      | 0.00        | 0.00     | 0.00          | 0.00     | 0.00         | 0.00         | 0.00    | 0.01            | 0.00       | 0.00           | 0.00      | 0.00               | 0.00                | 0.00 | 0.00    | 0.00     | 0.00            | 0.00             |
|                         |                             | <i>Pseudoxanthomonas</i>        | 0.00           | 0.00      | 0.00       | 0.00       | 0.00   | 0.00 | 0.00    | 0.00      | 0.00   | 0.00      | 0.00        | 0.00     | 0.00          | 0.00     | 0.00         | 0.00         | 0.00    | 0.00            | 0.00       | 0.00           | 0.00      | 0.00               | 0.00                | 0.00 | 0.00    | 0.00     | 0.00            | 0.00             |
| <i>Stenotrophomonas</i> |                             | 0.01                            | 0.00           | 0.04      | 0.00       | 0.00       | 0.00   | 0.07 | 0.04    | 0.01      | 0.00   | 0.00      | 0.02        | 0.01     | 0.00          | 0.00     | 0.00         | 0.02         | 0.06    | 0.00            | 0.01       | 0.00           | 0.01      | 0.00               | 0.01                | 0.00 | 0.00    | 0.00     | 0.00            |                  |
| TM7                     | –                           | –                               | 0.00           | 0.00      | 0.00       | 0.00       | 0.00   | 0.00 | 0.00    | 0.00      | 0.00   | 0.00      | 0.00        | 0.00     | 0.00          | 0.01     | 0.00         | 0.00         | 0.00    | 0.00            | 0.00       | 0.00           | 0.00      | 0.00               | 0.00                | 0.00 | 0.00    | 0.00     |                 |                  |
| Thermi                  | <i>Deinococcaceae</i>       | <i>Deinococcus geothermalis</i> | 0.00           | 0.00      | 0.00       | 0.00       | 0.00   | 0.00 | 0.00    | 0.00      | 0.00   | 0.00      | 0.00        | 0.00     | 0.00          | 0.00     | 0.00         | 0.00         | 0.00    | 0.00            | 0.00       | 0.00           | 0.00      | 0.00               | 0.00                | 0.00 | 0.00    | 0.00     | 0.00            |                  |
|                         |                             | <i>Thermaceae</i>               | <i>Thermus</i> | 0.00      | 0.00       | 0.00       | 0.00   | 0.00 | 0.00    | 0.00      | 0.00   | 0.00      | 0.00        | 0.00     | 0.00          | 0.00     | 0.00         | 0.00         | 0.00    | 0.00            | 0.00       | 0.00           | 0.00      | 0.00               | 0.00                | 0.00 | 0.00    | 0.00     | 0.00            | 0.00             |
|                         | <i>Thermus thermophilus</i> | 0.00                            | 0.00           | 0.00      | 0.00       | 0.00       | 0.00   | 0.00 | 0.00    | 0.00      | 0.00   | 0.00      | 0.00        | 0.00     | 0.00          | 0.00     | 0.00         | 0.00         | 0.00    | 0.00            | 0.00       | 0.00           | 0.00      | 0.00               | 0.00                | 0.00 | 0.00    | 0.00     | 0.00            |                  |

\*Values of 0.00 indicate a relative abundance <0.001.





| Phylum        | Family                      | Genus/Species                  | Vat  | Tank Curd | Curd Bench | KnifeCurd | Dipper | Hand | Chopper | Stretcher | Molder | Chopper 2 | Stretcher 2 | Molder 2 | Tank Scamorza | Scamorza | Tank Ricotta | Mold Ricotta | Ricotta | Mold Mozzarella | Mozzarella | Mold Grancacio | Grancacio | Brine Caciocavallo | CacioAfterMoulding | Rope | Hook t0 | Hook t30 | Caciocavallo t0 | Caciocavallo t30 |      |
|---------------|-----------------------------|--------------------------------|------|-----------|------------|-----------|--------|------|---------|-----------|--------|-----------|-------------|----------|---------------|----------|--------------|--------------|---------|-----------------|------------|----------------|-----------|--------------------|--------------------|------|---------|----------|-----------------|------------------|------|
| Basidiomycota | <i>Cystofilobasidiaceae</i> | <i>Udeniomyces pannonicus</i>  | 0.00 | 0.12      | 0.00       | 0.00      | 0.00   | 0.00 | 0.07    | 0.01      | 0.00   | 0.01      | 0.04        | 0.00     | 0.00          | 0.00     | 0.00         | 0.00         | 0.00    | 0.00            | 0.00       | 0.00           | 0.00      | 0.00               | 0.00               | 0.00 | 0.00    | 0.00     | 0.00            | 0.00             | 0.00 |
|               | <i>Tremellaceae</i>         | <i>Cryptococcus albidus</i>    | 0.00 | 0.00      | 0.00       | 0.00      | 0.00   | 0.06 | 0.00    | 0.00      | 0.00   | 0.00      | 0.00        | 0.00     | 0.00          | 0.00     | 0.00         | 0.00         | 0.00    | 0.00            | 0.00       | 0.00           | 0.00      | 0.00               | 0.00               | 0.00 | 0.00    | 0.00     | 0.00            | 0.00             | 0.00 |
|               |                             | <i>Cryptococcus curvatus</i>   | 0.00 | 0.00      | 0.00       | 0.00      | 0.00   | 0.00 | 0.00    | 0.00      | 0.00   | 0.02      | 0.00        | 0.00     | 0.01          | 0.00     | 0.05         | 0.01         | 0.00    | 0.01            | 0.02       | 0.00           | 0.00      | 0.01               | 0.01               | 0.00 | 0.00    | 0.02     | 0.01            | 0.00             | 0.01 |
|               |                             | <i>Cryptococcus flavescens</i> | 0.00 | 0.00      | 0.00       | 0.00      | 0.00   | 0.00 | 0.00    | 0.00      | 0.00   | 0.00      | 0.00        | 0.00     | 0.00          | 0.00     | 0.08         | 0.00         | 0.00    | 0.00            | 0.11       | 0.00           | 0.00      | 0.00               | 0.00               | 0.00 | 0.00    | 0.00     | 0.00            | 0.00             | 0.00 |
|               |                             | <i>Cryptococcus laurentii</i>  | 0.00 | 0.00      | 0.00       | 0.00      | 0.01   | 0.00 | 0.00    | 0.00      | 0.00   | 0.00      | 0.00        | 0.00     | 0.00          | 0.00     | 0.03         | 0.00         | 0.11    | 0.00            | 0.03       | 0.00           | 0.00      | 0.00               | 0.00               | 0.00 | 0.00    | 0.00     | 0.00            | 0.00             | 0.00 |
|               | <i>Trichosporonaceae</i>    | <i>Trichosporon cutaneum</i>   | 0.00 | 0.00      | 0.00       | 0.00      | 0.00   | 0.05 | 0.00    | 0.00      | 0.00   | 0.01      | 0.00        | 0.00     | 0.01          | 0.00     | 0.00         | 0.00         | 0.00    | 0.00            | 0.00       | 0.00           | 0.00      | 0.00               | 0.00               | 0.00 | 0.00    | 0.00     | 0.01            | 0.00             |      |
|               |                             | <i>Trichosporon domesticum</i> | 0.03 | 0.00      | 0.02       | 0.00      | 0.00   | 0.00 | 0.00    | 0.00      | 0.03   | 0.01      | 0.02        | 0.03     | 0.00          | 0.00     | 0.00         | 0.00         | 0.00    | 0.00            | 0.00       | 0.00           | 0.00      | 0.00               | 0.00               | 0.00 | 0.00    | 0.00     | 0.00            | 0.00             | 0.00 |
|               |                             | <i>Trichosporon faecale</i>    | 0.13 | 0.84      | 0.76       | 0.89      | 0.02   | 0.01 | 0.01    | 0.08      | 0.00   | 0.35      | 0.15        | 0.26     | 0.43          | 0.04     | 0.07         | 0.07         | 0.02    | 0.23            | 0.05       | 0.06           | 0.02      | 0.00               | 0.09               | 0.06 | 0.00    | 0.00     | 0.06            | 0.04             |      |
|               |                             | <i>Trichosporon lactis</i>     | 0.00 | 0.00      | 0.00       | 0.00      | 0.00   | 0.00 | 0.00    | 0.02      | 0.00   | 0.00      | 0.00        | 0.00     | 0.01          | 0.01     | 0.06         | 0.00         | 0.00    | 0.01            | 0.07       | 0.00           | 0.00      | 0.07               | 0.00               | 0.00 | 0.00    | 0.04     | 0.02            | 0.00             |      |
|               |                             | <i>Trichosporon quehoae</i>    | 0.00 | 0.00      | 0.00       | 0.00      | 0.15   | 0.01 | 0.00    | 0.00      | 0.00   | 0.01      | 0.02        | 0.01     | 0.01          | 0.04     | 0.00         | 0.00         | 0.00    | 0.00            | 0.01       | 0.00           | 0.00      | 0.02               | 0.00               | 0.00 | 0.00    | 0.02     | 0.01            | 0.00             |      |

\*Values of 0.00 indicate a relative abundance <0.001.

**Figure S1** - Principal Coordinates Analysis (PCoA) based on weighted UniFrac distances for 16S rRNA gene sequence data (panel a) and PCoA based on Bray Curtis distances for 26S rRNA gene sequences (panel b). Samples are labeled with different colors according to their origin.

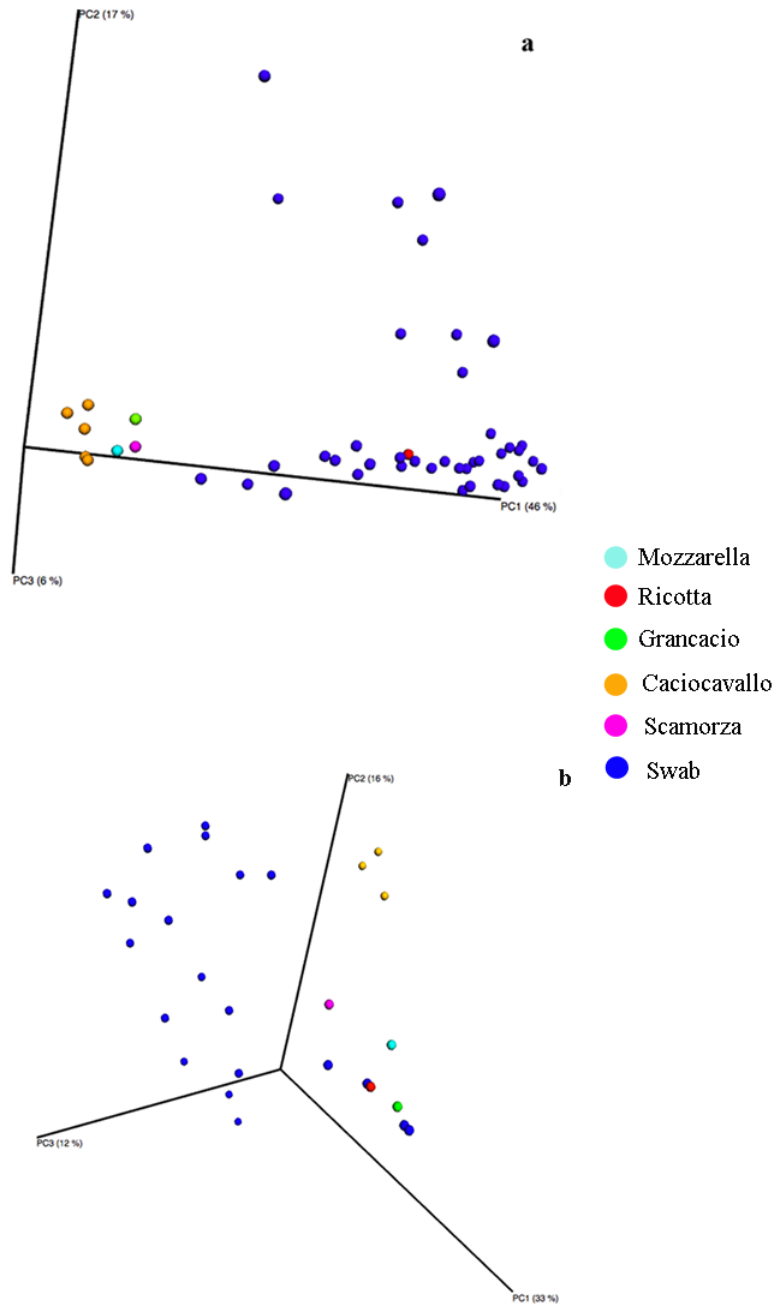

Supplement: AEM.02294-15_zam999116727so1.pdf [file AEM.02294-15_zam999116727so1.pdf]
